# Supplementary material for: Neurodevelopmental Toxicity of Emamectin Benzoate to the Early Life Stage of Zebrafish Larvae (Danio rerio)
Source: MDPI journal article supplement (doi:10.3390/ijms24043757), 2023-02-13
Supplement: s1 [file s1]

## Supplementary Table S1.

**Supplementary Table S1. Sequences of primers for the genes tested.**

| Target Gene      | GenBank Accession No. | Primer Sequences                           |
|------------------|-----------------------|--------------------------------------------|
| <i>β-actin</i>   | AF025305              | Forward: 5'-ACAGGGAAAAGATGACACAGATCA-3'    |
|                  |                       | Reverse: 5'-CAGCCTGGATGGCAACGTA-3'         |
| <i>Cat</i>       | NM_130912.2           | Forward: 5'-AGGGCAACTGGGATCTTACA-3'        |
|                  |                       | Reverse: 5'-TTTATGGGACCAGACCTTGG-3'        |
| <i>Sod</i>       | BX055516              | Forward: 5'-GTCCGCACTTCAACCCTCA-3'         |
|                  |                       | Reverse: 5'-TCCTCATTGCCACCCTTCC-3'         |
| <i>Cu/Zn-Sod</i> | NM_131294.1           | Forward: 5'-GTCGCTGGCTTGTGGAGTG-3'         |
|                  |                       | Reverse: 5'-TGTCAGCGGGCTAGTGCTT-3'         |
| <i>gat1</i>      | NM_001007362          | Forward: 5'- ATGCTGTTTATCCTGTTCATCCG-3'    |
|                  |                       | Reverse: 5'- TGTTGAAGGGGTGTAGCTCC-3'       |
| <i>gabra1</i>    | NM_001077326          | Forward: 5'- TCAGGCAGAGCTGGAAGGAT-3'       |
|                  |                       | Reverse: 5'- TGCCGTTGTGGAAGAACGT-3'        |
| <i>gad1b</i>     | NM_194419             | Forward: 5'- AACTCAGGCGATTGTTGCAT-3'       |
|                  |                       | Reverse: 5'- TGAGGACATTTCCAGCCTTC-3'       |
| <i>abat</i>      | NM_201498             | Forward: 5'- GCGTTCAGGCAAAGCTCT-3'         |
|                  |                       | Reverse: 5'- GCAGGACGGAACGGAT-3'           |
| <i>glsa</i>      | NM_001045044.1        | Forward: 5'- AGGCCATGCTGAGGTTG -3'         |
|                  |                       | Reverse: 5'-CTGCCGTGCTGAGGTTG-3'           |
| <i>syn2a</i>     | NM_001002597          | Forward: 5'-GTGACCATGCCAGCATTTTC-3'        |
|                  |                       | Reverse: 5'-TGGTTCTCCACTTTACCTT-3'         |
| <i>gfap</i>      | NM_131373             | Forward: 5'- GGATGCAGCCAATCGTAAT-3'        |
|                  |                       | Reverse: 5'- TTCCAGGTCACAGGTCAG-3'         |
| <i>elavl3</i>    | NM_131449             | Forward: 5'- AGACAAGATCACAGGCCAGAGCTT-3'   |
|                  |                       | Reverse: 5'- TGGTCTGCAGTTTGAGACCGTTGA-3'   |
| <i>shha</i>      | NM131063.3            | Forward: 5'-TGTCTCGACAACCTCAACGG -3'       |
|                  |                       | Reverse: 5'- TCCGTGTATATCCGCTGCAC -3'      |
| <i>gap43</i>     | NM_131341             | Forward: 5'- TGCTGCATCAGAAGAACTAA-3'       |
|                  |                       | Reverse: 5'- CCTCCGTTTGATTCCATC-3'         |
| <i>Nrd</i>       | NM_130978.2           | Forward: 5'- CCTCATTTGACGGACCCCTTAG -3'    |
|                  |                       | Reverse: 5'- AGACCCGCTGCCTGATAGTGC -3'     |
| <i>foxA3</i>     | NM_131299.1           | Forward: 5'- TCTCAGCTTAGGCTGTTTGTAAGAT -3' |
|                  |                       | Reverse: 5'-AAAAATACATCATGGCAATTTTCATT-3'  |
| <i>pbx1a</i>     | AJ245962.1            | Forward: 5'- GAGGGAAGAAAACAGGACATTG -3'    |
|                  |                       | Reverse: 5'-TTTCTTTTATTTACACAGGACGTT-3'    |
| <i>mnx1</i>      | NM_001009885.2        | Forward: 5'- AAACCTACAGCCAGCTCCTT -3'      |
|                  |                       | Reverse: 5'-AAGCGTTTGGTCTGGATAGATATT-3'    |
| <i>has2</i>      | NM_153650.2           | Forward: 5'- GAAGGTTTGTAGAGTGTCTGGAGAG -3' |
|                  |                       | Reverse: 5'-TTGTTACAAGCTTATACCCCATGAT-3'   |

|                |                |                                          |
|----------------|----------------|------------------------------------------|
| <i>elov11a</i> | NM_001005989.3 | Forward: 5'-CCACGACTATCTCTTGAAAAGAAC -3' |
|                |                | Reverse: 5'-CGACATCAAGAACTCATAAACAGTG-3' |
